# Supplementary material for: Assessment of a Serum Microrna Risk Score for Colorectal Cancer among Participants of Screening Colonoscopy at Various Stages of Colorectal Carcinogenesis
Source: MDPI journal article supplement (doi:10.3390/cells11152462), 2022-08-08
Supplement: s1 [file s1]

Supplementary materials for:

# Assessment of a serum microRNA risk score for colorectal cancer among participants of screening colonoscopy at various stages of colorectal carcinogenesis

Janhavi R. Raut<sup>1,2,3</sup>, Megha Bhardwaj<sup>1</sup>, Tobias Niedermaier<sup>1</sup>, Kaya Miah<sup>4</sup>, Petra Schrotz-King<sup>3</sup> and Hermann Brenner<sup>1,3,5</sup>

**Supplementary Table S1. Information on the quantitative real-time polymerase chain reaction primers (QIAGEN).**

|    | microRNA   | Accession    | Catalog number | Sequence                |
|----|------------|--------------|----------------|-------------------------|
| 1  | let-7g-5p  | MIMAT0000414 | YP00204565     | UGAGGUAGUAGUUUGUACAGUU  |
| 2  | miR-19a-3p | MIMAT0000073 | YP00205862     | UGUGCAAUCUAUGCAAACUGA   |
| 3  | miR-23a-3p | MIMAT0000078 | YP00204772     | AUCACAUUGCCAGGGAUUUCC   |
| 4  | miR-92a-3p | MIMAT0000092 | YP00204258     | UAUUGCACUUGUCCCGGCCUGU  |
| 5  | miR-144-5p | MIMAT0004600 | YP00204670     | GGAUAUCAUCAUAUACUGUAAG  |
| 6  | miR-21-5p  | MIMAT0000076 | YP00204230     | UAGCUUAUCAGACUGAUGUUGA  |
| 7  | miR-27a-3p | MIMAT0000084 | YP00206038     | UUCACAGUGGCUAAGUCCGC    |
| 8  | miR-93-5p  | MIMAT0000093 | YP00204715     | CAAAGUGCUGUUCGUGCAGGUAG |
| 9  | miR-1246   | MIMAT0005898 | YP00205630     | AAUGGAUUUUUGGAGCAGG     |
| 10 | miR-223-3p | MIMAT0000280 | YP00205986     | UGUCAGUUUGUCAAAUACCCCA  |

**Supplementary Table S2. Comparison of miR-score distributions between groups with various findings at screening colonoscopy including sub-groups of advanced colorectal adenomas with and without high-grade dysplasia.**

| miR-score                    | Comparison<br>CRC-HGDAA  | Comparison<br>HGDAA-<br>WoHGDAA | Comparison<br>WoHGDAA-<br>NAA | Comparison<br>NAA |
|------------------------------|--------------------------|---------------------------------|-------------------------------|-------------------|
|                              | CRC (n = 52)             | HGDAA (n = 9)                   | WoHGDAA (n = 91)              | NAA (n = 88)      |
| Mean (SD)                    | -0.8 (0.7)               | -0.2 (0.7)                      | -0.6 (0.7)                    | -0.8 (0.7)        |
| Median (range)               | -0.8 (-2.6-0.7)          | -0.1 (-1.3-1.2)                 | -0.6 (-2.4-0.6)               | -0.8 (-2.6-0.9)   |
| <i>p</i> -value <sup>a</sup> | <b>0.013</b>             | 0.083                           |                               | 0.068             |
|                              | OR (95% CI) <sup>b</sup> | OR (95% CI) <sup>b</sup>        | OR (95% CI) <sup>b</sup>      |                   |
| OR per SD increase           | <b>0.32 (0.12-0.88)</b>  | <b>2.47 (1.03- 5.90)</b>        | 1.27 (0.94-1.72)              |                   |

<sup>a</sup> Assessed by Mann-Whitney test. <sup>b</sup> Adjusted for age and sex. Bold values indicate statistically significant results. Abbreviations: CI, confidence interval; CRC, colorectal cancer; HGDAA, advanced colorectal adenoma with high-grade dysplasia; miR-score, microRNA risk score; n, number; NAA, non-advanced colorectal adenoma; OR, odds ratio; SD, standard deviation; WoHGDAA, advanced colorectal adenoma without high-grade dysplasia.
